# Supplementary material
Source: PubMed Central journal article supplement (PMC170942)

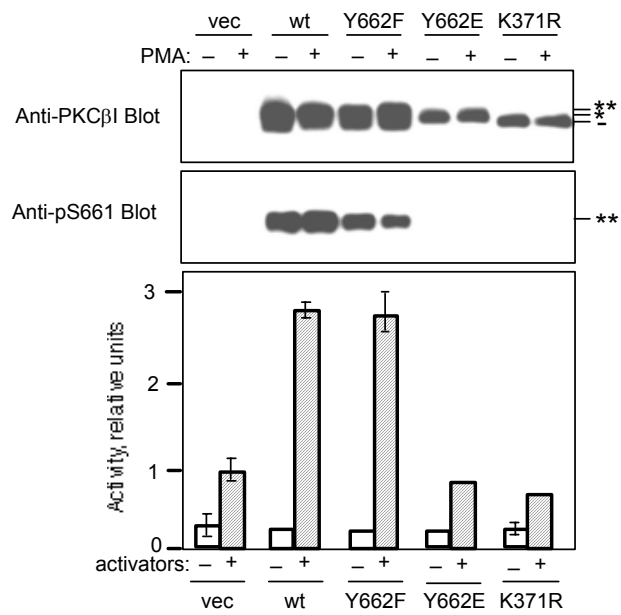

Supplement: pnas_1633695100_3.pdf [file pnas_1633695100_3.pdf]
